# Supplementary material for: The topology of the bacterial co-conserved protein network and its implications for predicting protein function
Source: PubMed Central journal article supplement (PMC2488357; doi:10.1186/1471-2164-9-313), 2008-06-30
Supplement: 1471-2164-9-313-S4.pdf [file 1471-2164-9-313-S4.pdf]

90/10 removed

TIGR

90/10 not removed

a) All

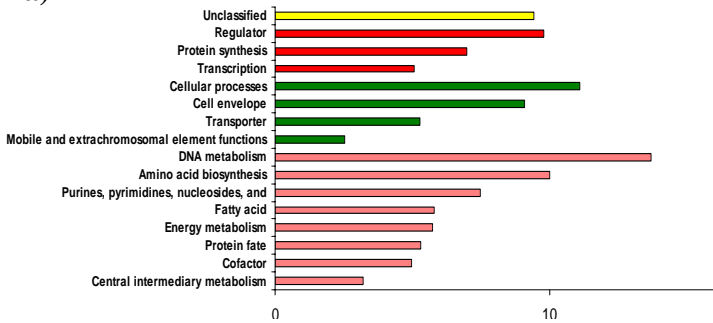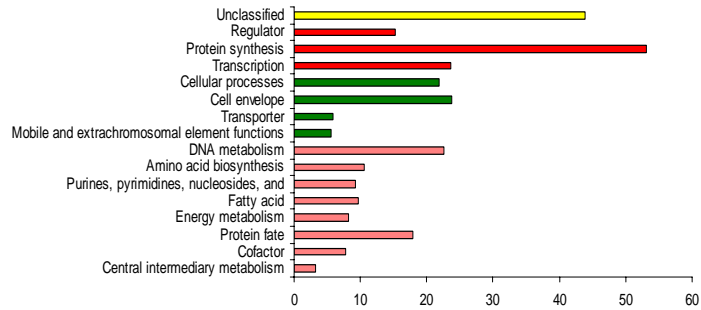

b) Motile

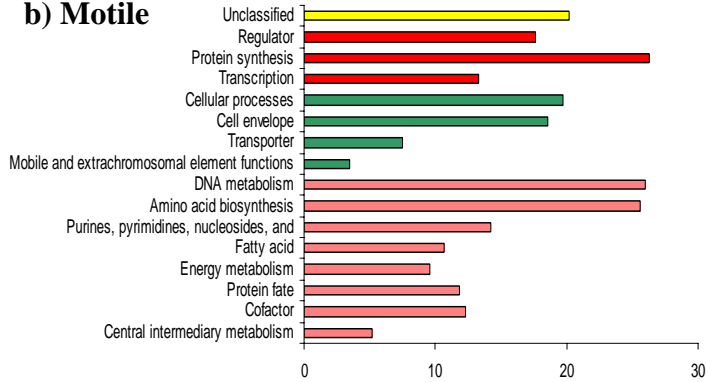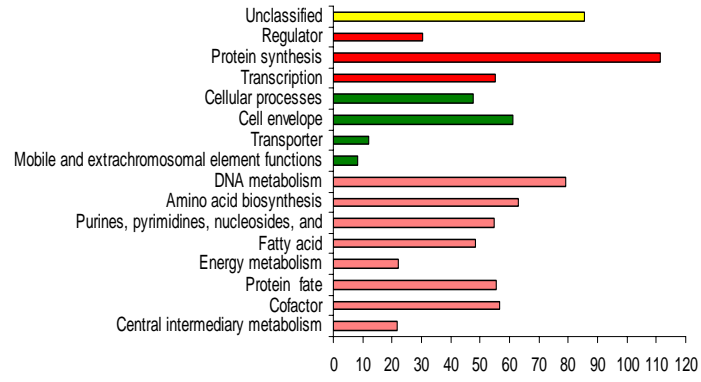

c) Proteobacteria

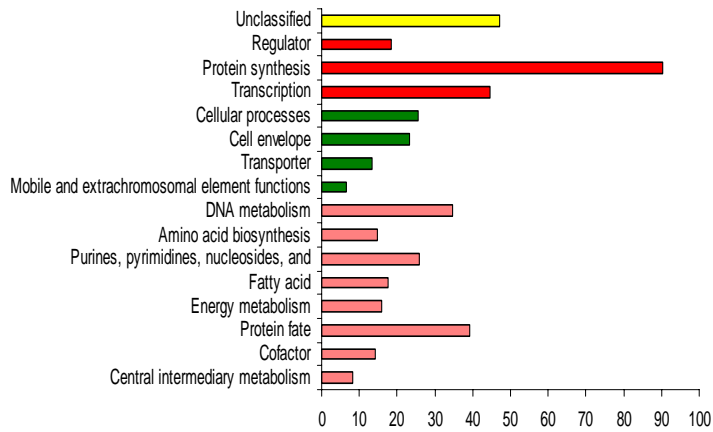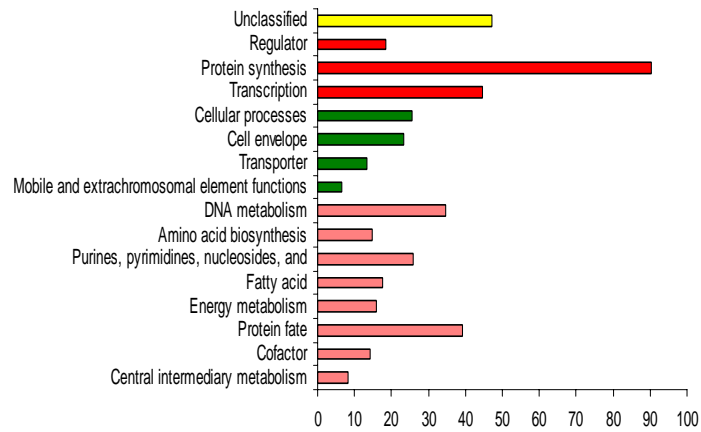

d) Aerobic

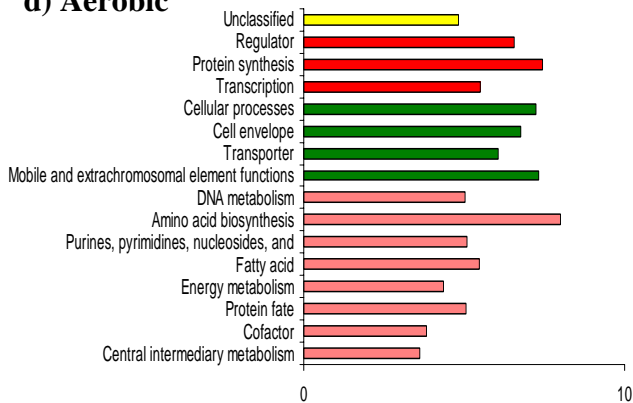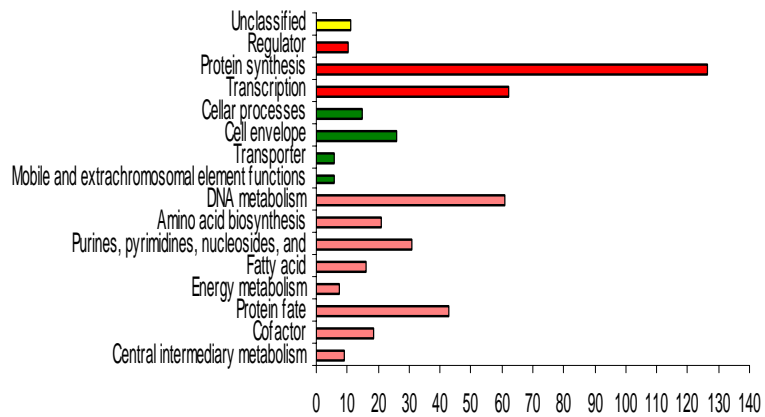

Average connectivity

Average connectivity
