# Supplementary material for: The topology of the bacterial co-conserved protein network and its implications for predicting protein function
Source: PubMed Central journal article supplement (PMC2488357; doi:10.1186/1471-2164-9-313), 2008-06-30

a)

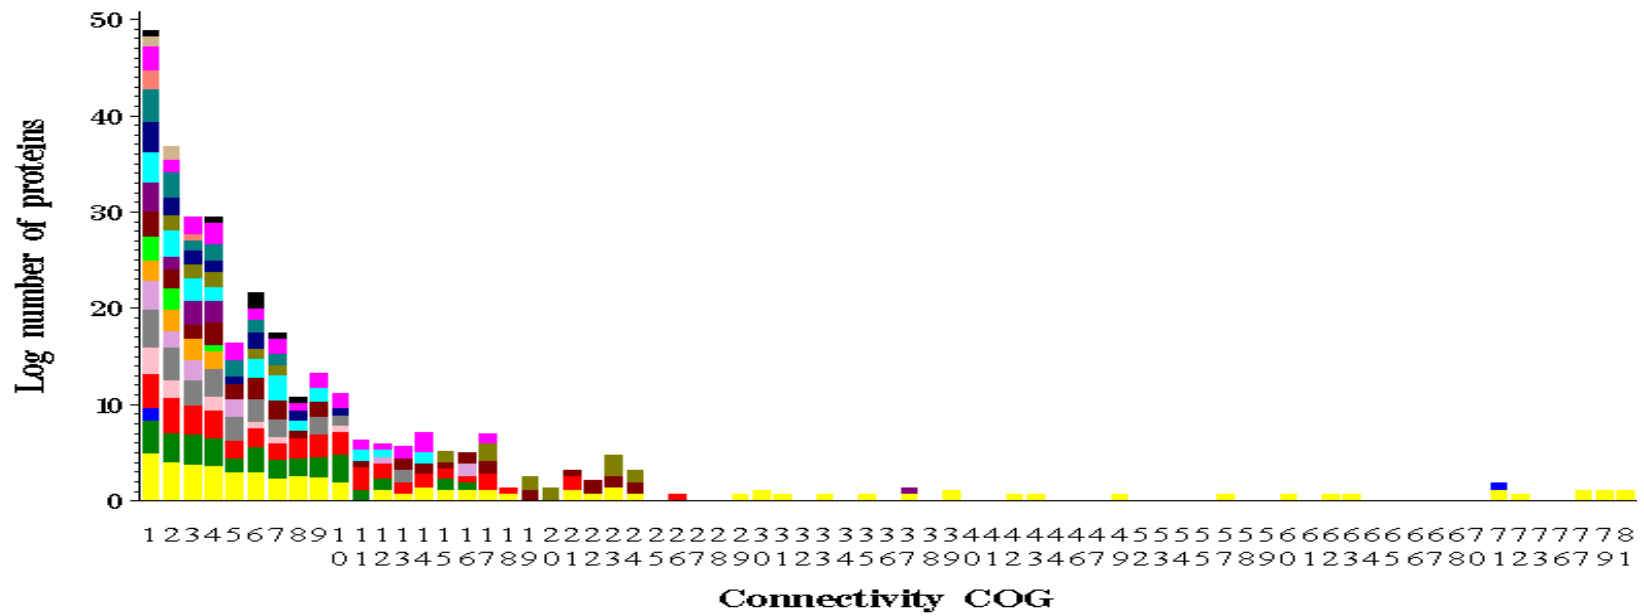

b)

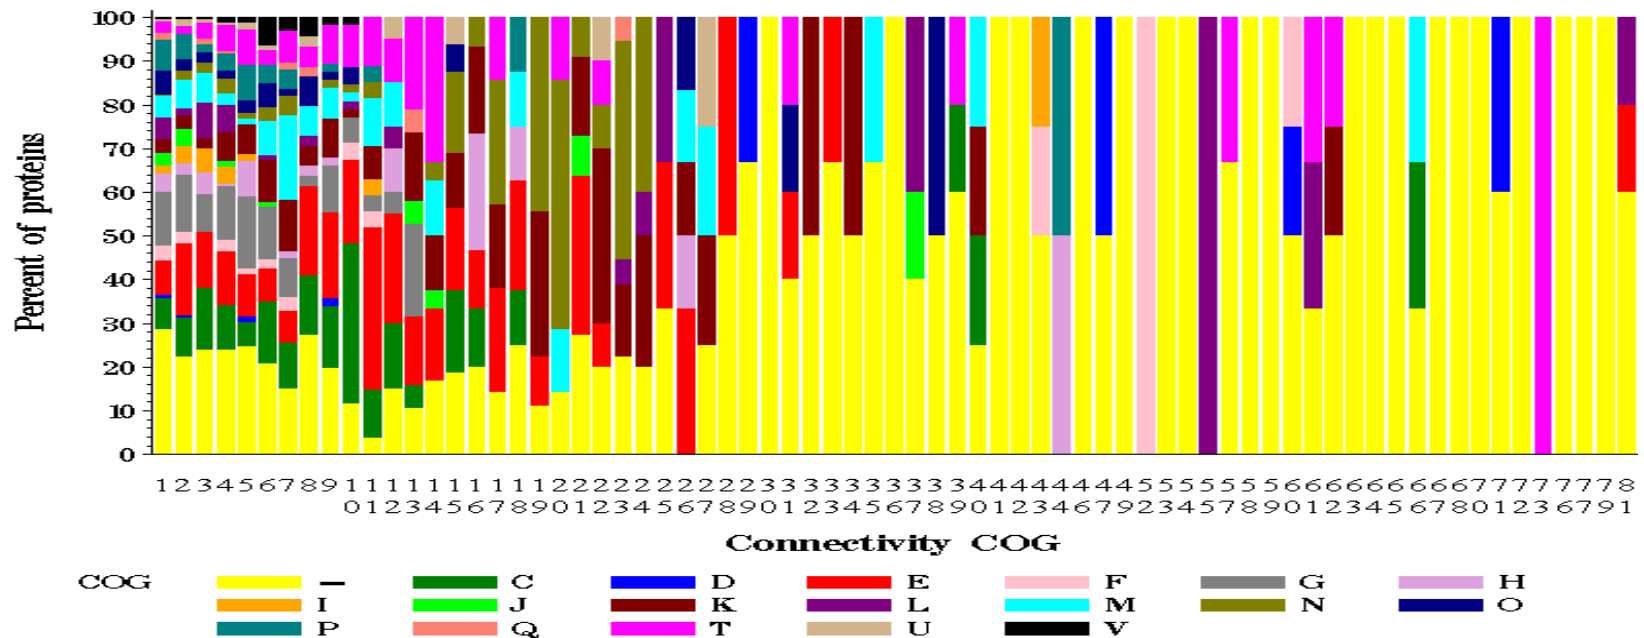

Supplement: 1471-2164-9-313-S5.pdf [file 1471-2164-9-313-S5.pdf]
