# Supplementary material for: The topology of the bacterial co-conserved protein network and its implications for predicting protein function
Source: PubMed Central journal article supplement (PMC2488357; doi:10.1186/1471-2164-9-313), 2008-06-30
Supplement: 1471-2164-9-313-S6.pdf [file 1471-2164-9-313-S6.pdf]

a)

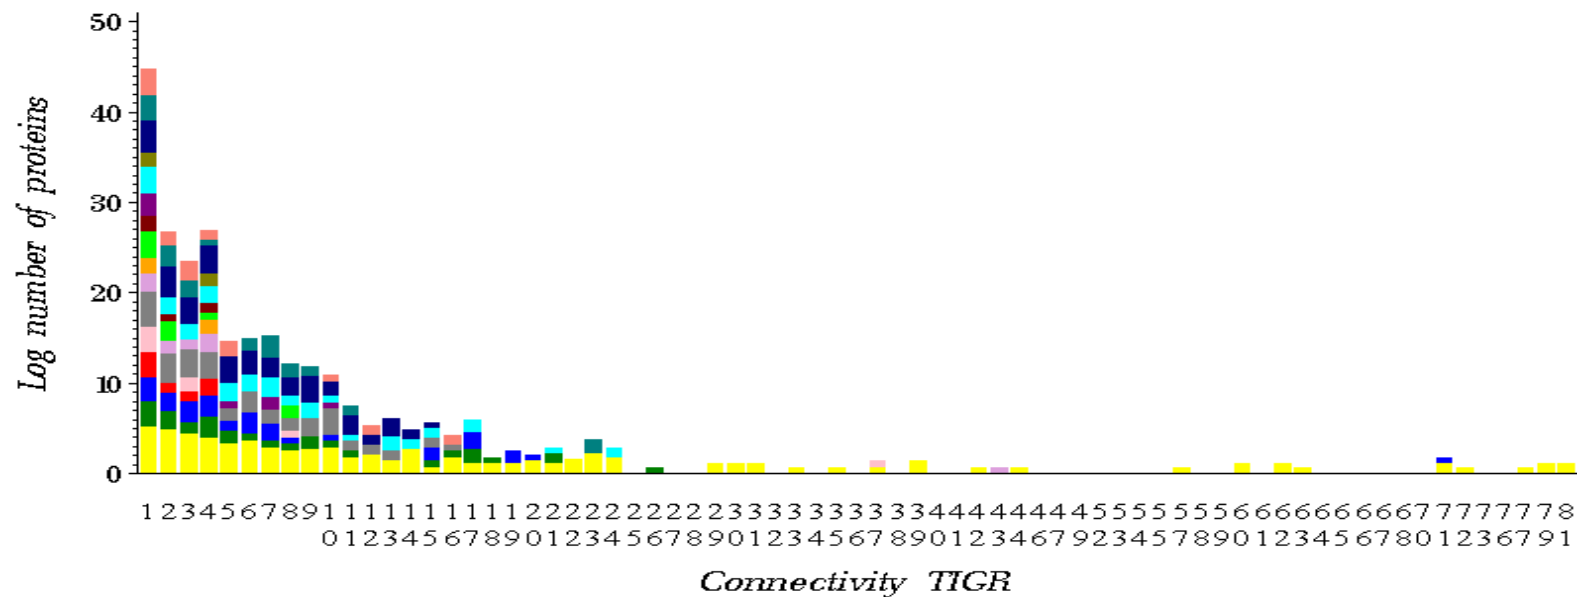

b)

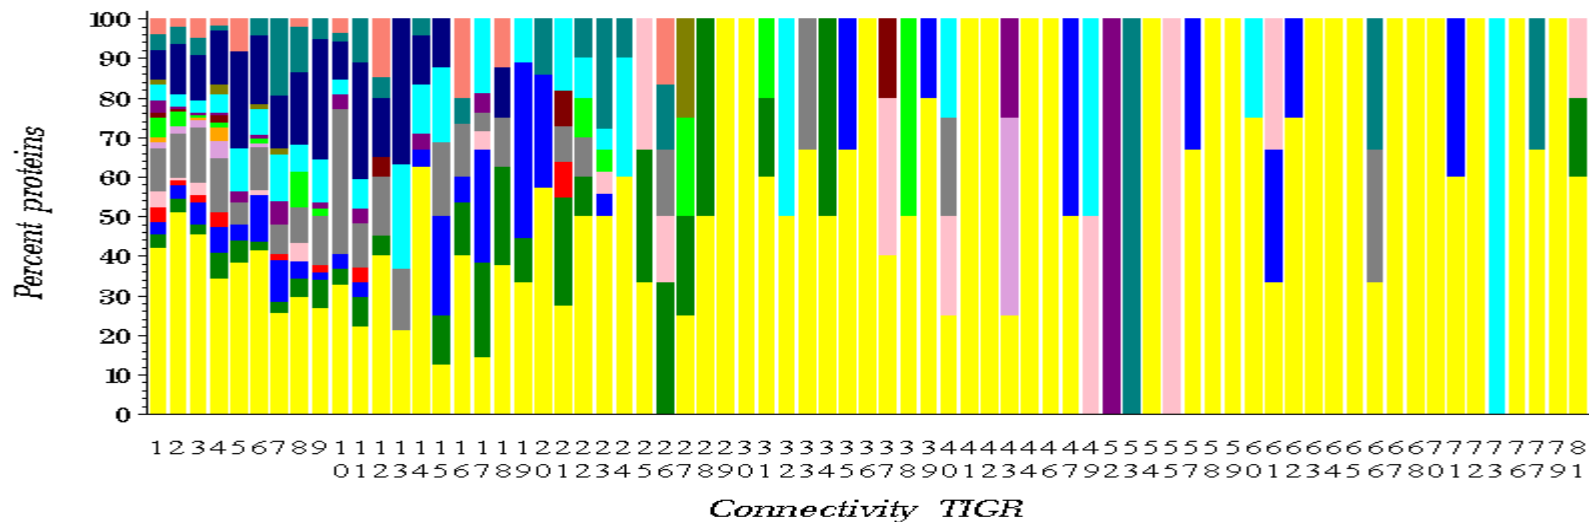

TIGR

■ Unclassified  
■ Central metabolism  
■ Fatty acid  
■ Protein synthesis  
■ Transcription  
■ cofactor

■ Amino acid  
■ DNA metabolism  
■ Mobile extra element  
■ Purines pyrimidine  
■ Transport binding

■ Cellular processes  
■ Energy metabolism  
■ Protein fate  
■ Regulatory function  
■ cell Envelope
