# Supplementary material for: The topology of the bacterial co-conserved protein network and its implications for predicting protein function
Source: PubMed Central journal article supplement (PMC2488357; doi:10.1186/1471-2164-9-313), 2008-06-30
Supplement: 1471-2164-9-313-S7.pdf [file 1471-2164-9-313-S7.pdf]

| NO. | Size | Gene | KEGG function             | COG function                              | TIGR function       | Predicted function                                                                                    |
|-----|------|------|---------------------------|-------------------------------------------|---------------------|-------------------------------------------------------------------------------------------------------|
| 1   | 3    | glcF | -                         | -                                         | -                   | Energy<br>(EcoCyc central intermediary metabolism, New COG C)                                         |
|     |      | ykgE | -                         | Energy production (C)                     | -                   |                                                                                                       |
|     |      | glpC | Metabolism                | Energy production (C)                     | Energy metabolism   |                                                                                                       |
| 2   | 8    | nanR | -                         | -                                         | -                   | Regulatory/Transcription<br>(EcoCyc Regulatory, New COG K)                                            |
|     |      | yieP | -                         | -                                         | -                   | Regulatory/Transcription<br>(EcoCyc Regulatory, New COG K)                                            |
|     |      | dgoR | -                         | -                                         | Regulatory function |                                                                                                       |
|     |      | lldR | -                         | Transcription (K)                         | -                   |                                                                                                       |
|     |      | exuR | -                         | Transcription (K)                         | Regulatory function |                                                                                                       |
|     |      | glcC | -                         | Transcription (K)                         | Regulatory function |                                                                                                       |
|     |      | pdhR | -                         | Transcription (K)                         | Regulatory function |                                                                                                       |
|     |      | uxuR | -                         | Transcription (K)                         | Regulatory function |                                                                                                       |
| 3   | 5    | caiC | -                         | -                                         | -                   | Metabolism/ Lipid metabolism<br>(EcoCyc amines, New COG I)                                            |
|     |      | ydiD | -                         | -                                         | -                   | Metabolism/ Lipid metabolism<br>(EcoCyc fatty acids, New COG I)                                       |
|     |      | aas  | Metabolism                | Lipid metabolism (I)                      | Fatty acid          |                                                                                                       |
|     |      | fadD | Metabolism                | Lipid metabolism (I)                      | Fatty acid          |                                                                                                       |
|     |      | entE | Metabolism                | Secondary metabolites biosynthesis (Q)    | Central metabolism  |                                                                                                       |
| 4   | 3    | yehQ | -                         | -                                         | -                   | Metabolism/ Lipid metabolism<br>(EcoCyc predicted as regulator)                                       |
|     |      | yhbT | -                         | Lipid metabolism (I)                      | -                   |                                                                                                       |
|     |      | yhbV | -                         | Posttranslational modification (O)        | -                   |                                                                                                       |
| 5   | 5    | yegR | -                         | -                                         | -                   | Cellular processes/Cell motility and secretion<br>(EcoCyc regulator of flagellar motility, New COG M) |
|     |      | flgA | Cellular processes        | Cell motility and secretion (N)           | Cellular processes  |                                                                                                       |
|     |      | fliL | Cellular processes        | Cell motility and secretion (N)           | Cellular processes  |                                                                                                       |
|     |      | flhC | Environmental Information | -                                         | Cellular processes  |                                                                                                       |
|     |      | flhD | Environmental Information | -                                         | Cellular processes  |                                                                                                       |
| 6   | 4    | yjfR | -                         | -                                         | -                   | Carbohydrate transport and metabolism<br>(EcoCyc carbon utilization)                                  |
|     |      | sgaB | Environmental Information | Carbohydrate transport and metabolism (G) | Energy metabolism   |                                                                                                       |
|     |      | sgaU | Metabolism                | Carbohydrate transport and metabolism (G) | -                   |                                                                                                       |
|     |      | sgbU | Metabolism                | Carbohydrate transport and metabolism (G) | -                   |                                                                                                       |
| 7   | 3    | yegB | -                         | -                                         | -                   | Signal transduction mechanism                                                                         |
|     |      | yeaH | -                         | -                                         | -                   | Signal transduction mechanism                                                                         |
|     |      | yeaG | -                         | Signal transduction mechanism (T)         | -                   |                                                                                                       |
| 8   | 3    | ydeG | -                         | -                                         | -                   | Cell envelop biogenesis<br>(EcoCyc osmotic pressure)                                                  |
|     |      | mdoH | -                         | Cell envelope biogenesis (M)              | -                   |                                                                                                       |
|     |      | mdoG | -                         | Inorganic ion transport and metabolism    | -                   |                                                                                                       |
| 9   | 9    | yfiD | -                         | -                                         | -                   | ???<br>(EcoCyc energy metabolism)                                                                     |
|     |      | yjjW | -                         | Posttranslational modification (O)        | -                   |                                                                                                       |
|     |      | pflC | Genetic Information       | -                                         | Protein fate        |                                                                                                       |
|     |      | pflA | Genetic Information       | Posttranslational modification (O)        | Energy metabolism   |                                                                                                       |
|     |      | ybiY | Genetic Information       | Posttranslational modification (O)        | Protein fate        |                                                                                                       |

|    |   |      |            |                                           |                     |                                                                                    |
|----|---|------|------------|-------------------------------------------|---------------------|------------------------------------------------------------------------------------|
|    |   | tdcE | Metabolism | -                                         | Energy metabolism   |                                                                                    |
|    |   | pflB | Metabolism | Energy production (C)                     | Energy metabolism   |                                                                                    |
|    |   | pflD | Metabolism | Energy production (C)                     | Protein fate        |                                                                                    |
|    |   | ybiW | Metabolism | Energy production (C)                     | Protein fate        |                                                                                    |
| 10 | 4 | rpiR | -          | -                                         | -                   | Regulatory/Transcription<br>(EcoCyc regulator, New COG K)                          |
|    |   | yfeT | -          | Transcription (K)                         | -                   |                                                                                    |
|    |   | yfhH | -          | Transcription (K)                         | -                   |                                                                                    |
|    |   | yebK | -          | Transcription (K)                         | Regulatory function |                                                                                    |
| 11 | 4 | yiiL | -          | -                                         | -                   | Metabolism<br>(EcoCyc carbon utilization)                                          |
|    |   | yjfP | -          | -                                         | -                   | Metabolism                                                                         |
|    |   | rhaA | Metabolism | -                                         | -                   |                                                                                    |
|    |   | rhaD | Metabolism | Carbohydrate transport and metabolism (G) | Energy metabolism   |                                                                                    |
| 12 | 3 | yghU | -          | -                                         | -                   | Posttranslational modification<br>(EcoCyc central int. metabolism,<br>New COG O)   |
|    |   | yliJ | -          | -                                         | -                   | Posttranslational modification<br>(New COG O)                                      |
|    |   | yfcG | -          | Posttranslational modification (O)        | -                   |                                                                                    |
| 13 | 3 | yehR | -          | -                                         | -                   | Carbohydrate transport and<br>metabolism                                           |
|    |   | gatA | Metabolism | Carbohydrate transport and metabolism (G) | -                   |                                                                                    |
|    |   | gatB | Metabolism | Carbohydrate transport and metabolism (G) | -                   |                                                                                    |
| 14 | 6 | ydhC | -          | -                                         | -                   | Carbohydrate transport and<br>metabolism<br>(EcoCyc MFS transporter)               |
|    |   | emrD | -          | Carbohydrate transport and metabolism (G) | -                   |                                                                                    |
|    |   | bcr  | -          | Carbohydrate transport and metabolism (G) | Cellular processes  |                                                                                    |
|    |   | cmr  | -          | Carbohydrate transport and metabolism (G) | Cellular processes  |                                                                                    |
|    |   | ydY  | -          | Carbohydrate transport and metabolism (G) | Cellular processes  |                                                                                    |
|    |   | yjiO | -          | Carbohydrate transport and metabolism (G) | Cellular processes  |                                                                                    |
| 15 | 3 | leuO | -          | -                                         | -                   | ????<br>(EcoCyc Transcription, New COG K)                                          |
|    |   | ybeF | -          | -                                         | Energy metabolism   | ????<br>(New COG K)                                                                |
|    |   | ydZ  | -          | Transcription (K)                         | -                   |                                                                                    |
| 16 | 5 | yhfR | -          | -                                         | -                   | Regulatory/Transcription<br>(EcoCyc Transcription)                                 |
|    |   | farR | -          | Transcription (K)                         | -                   |                                                                                    |
|    |   | phnF | -          | Transcription (K)                         | -                   |                                                                                    |
|    |   | yegW | -          | Transcription (K)                         | -                   |                                                                                    |
|    |   | ydP  | -          | Transcription (K)                         | -                   |                                                                                    |
| 17 | 4 | araJ | -          | -                                         | -                   | Carbohydrate transport and<br>metabolism<br>(EcoCyc MFS transporter, New COG<br>G) |
|    |   | sotB | -          | Carbohydrate transport and metabolism (G) | -                   |                                                                                    |
|    |   | ydhP | -          | Carbohydrate transport and metabolism (G) | -                   |                                                                                    |
|    |   | yicM | -          | Carbohydrate transport and metabolism (G) | Regulatory function |                                                                                    |
| 18 | 4 | yibP | -          | -                                         | -                   | Cell envelope biogenesis<br>(EcoCyc cell processes, cell division)                 |
|    |   | ygeR | -          | -                                         | Cell envelope       |                                                                                    |
|    |   | yebA | -          | Cell envelope biogenesis (M)              | -                   |                                                                                    |
|    |   | nlpD | -          | Cell envelope biogenesis (M)              | Cell envelope       |                                                                                    |
| 19 | 3 | yjgK | -          | -                                         | -                   | Carbohydrate transport and<br>metabolism                                           |
|    |   | yhcH | -          | Carbohydrate transport and metabolism (G) | -                   |                                                                                    |
|    |   | ylaL | -          | Carbohydrate transport and metabolism (G) | -                   |                                                                                    |
| 20 | 8 | ydhF | -          | -                                         | -                   | Energy production /cofactor                                                        |

|    |   |      |   |                                         |          |                                                                        |
|----|---|------|---|-----------------------------------------|----------|------------------------------------------------------------------------|
|    |   | yeaE | - | -                                       | -        | Energy production /cofactor<br>(EcoCyc central int. metabolism<br>???) |
|    |   | dkgA | - | -                                       | cofactor | ???                                                                    |
|    |   | dkgB | - | -                                       | cofactor |                                                                        |
|    |   | tas  | - | Energy production (C)                   | -        |                                                                        |
|    |   | yajO | - | Energy production (C)                   | -        |                                                                        |
|    |   | ydjG | - | Energy production (C)                   | -        |                                                                        |
|    |   | yghZ | - | Energy production (C)                   | -        |                                                                        |
| 21 | 3 | ygcN | - | -                                       | -        | Energy production<br>(New COG C)                                       |
|    |   | fixC | - | Energy production (C)                   | -        |                                                                        |
|    |   | ydiS | - | Energy production (C)                   | -        |                                                                        |
| 22 | 3 | ybgL | - | -                                       | -        | Amino acid transport and metabolism                                    |
|    |   | ybgJ | - | Amino acid transport and metabolism (E) | -        |                                                                        |
|    |   | ybgK | - | Amino acid transport and metabolism (E) | -        |                                                                        |
