# Supplementary material for: The topology of the bacterial co-conserved protein network and its implications for predicting protein function
Source: PubMed Central journal article supplement (PMC2488357; doi:10.1186/1471-2164-9-313), 2008-06-30
Supplement: 1471-2164-9-313-S8.pdf [file 1471-2164-9-313-S8.pdf]

---

---

|                                    | All    | Motile  | Proteo | Aerobic |
|------------------------------------|--------|---------|--------|---------|
| Number of interactions (edges)     | 41,331 | 102,239 | 54,130 | 21,846  |
| Number of proteins (nodes)         | 2,721  | 3,098   | 2,988  | 2,244   |
| Log-log correlation (r)            | 0.87   | 0.75    | 0.77   | 0.58    |
| Power law exponent ( $\gamma$ )    | 1.17   | 1.12    | 1.18   | 1.08    |
| Average clustering coefficient (c) | 0.80   | 0.76    | 0.76   | 0.80    |
| Connectivity average (k)           | 30.38  | 66.00   | 36.22  | 19.47   |
| Standard deviation of connectivity | 52.21  | 100.00  | 57.62  | 44.55   |
| Average shortest path              | 5.21   | 9.30    | 5.94   | 6.36    |
| Diameter                           | 18     | 24      | 25     | 20      |

---
